# Supplementary material
Source: MDPI journal article supplement (https://www.mdpi.com/1996-1073/12/14/2747)
Supplement: s1 [file s1]

## Supplementary Materials:

# Impacts of Climate Change and Climate Variability on Hydropower Potential in Data-Scarce Regions Subjected to Multi-Decadal Variability

Pedro Arriagada <sup>1,\*</sup>, Bastien Dieppois <sup>2,3,4</sup>, Moussa Sidibe <sup>2</sup> and Oscar Link <sup>5</sup>

<sup>1</sup> Environmental Engineering Department, Universidad de Concepción, Concepcion 4070386, Chile

<sup>2</sup> Centre for Agroecology, Water and Resilience (CAWR), Coventry University, Coventry CV1 5FB, UK

<sup>3</sup> Department of Oceanography, University of Cape Town, Cape Town South Africa

<sup>4</sup> School of Geography, Earth and Environmental Sciences, University of Birmingham, Birmingham B15 2SA, UK

<sup>5</sup> Civil Engineering Department, Faculty of Engineering, Universidad de Concepción, Concepcion 4070386, Chile

\* Correspondence: parriagada@udec.cl; Tel.: +56-41-2204065

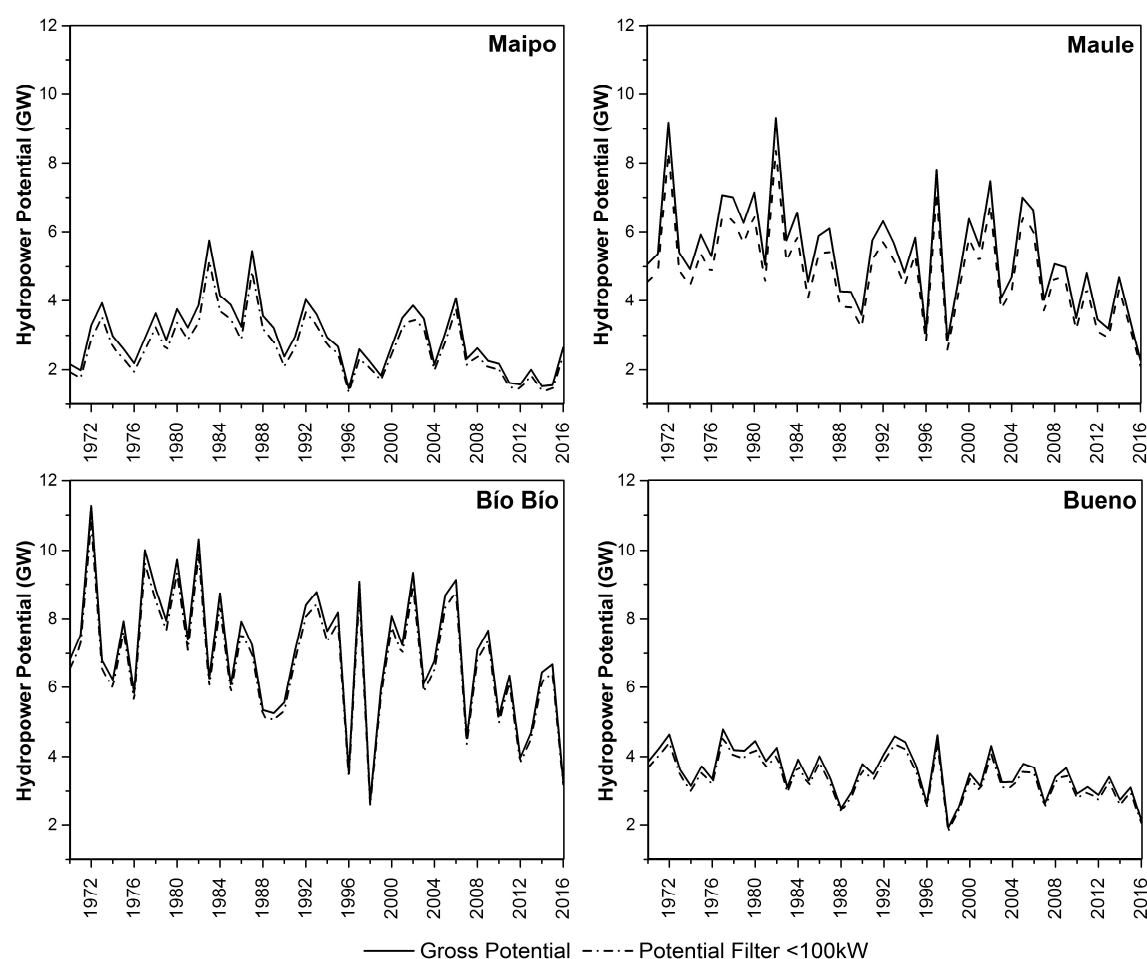

**Figure S1.** Effect of minimum power criterion on the annual hydropower potential in each basin.
